# Supplementary material for: Biometry extraction and probabilistic anatomical atlas of the anterior Visual Pathway using dedicated high-resolution 3-D MRI
Source: PubMed Central journal article supplement (PMC10764933; doi:10.1038/s41598-023-50980-x), 2024-01-03

# Biometry extraction and probabilistic anatomical atlas of the anterior Visual Pathway using dedicated high-resolution 3-D MRI.

## Authors:

Emanuele Pravata<sup>1,8\*†</sup>, Andrea Diociasi<sup>2†</sup>, Riccardo Navarra<sup>3</sup>, Luca Carmisciano<sup>2</sup>, Maria Pia Sormani<sup>2</sup>, Luca Roccatagliata<sup>2</sup>, Andrea Chincarini<sup>4</sup>, Alessandra Ossola<sup>6</sup>, Andrea Cardia<sup>6</sup>, Alessandro Cianfoni<sup>1,8</sup>, Alain Kaelin-Lang<sup>7,8</sup>, Claudio Gobbi<sup>7,8</sup> and Chiara Zecca<sup>7,8</sup>

## Supplementary information

**Supplementary figure S1.** Dice similarity index (DSI) scores density distribution results from the leave-one-out spatial similarity validation. The median score was 0.85 (continuous line) with 95% of comparisons scoring > 0.77 (dashed line).

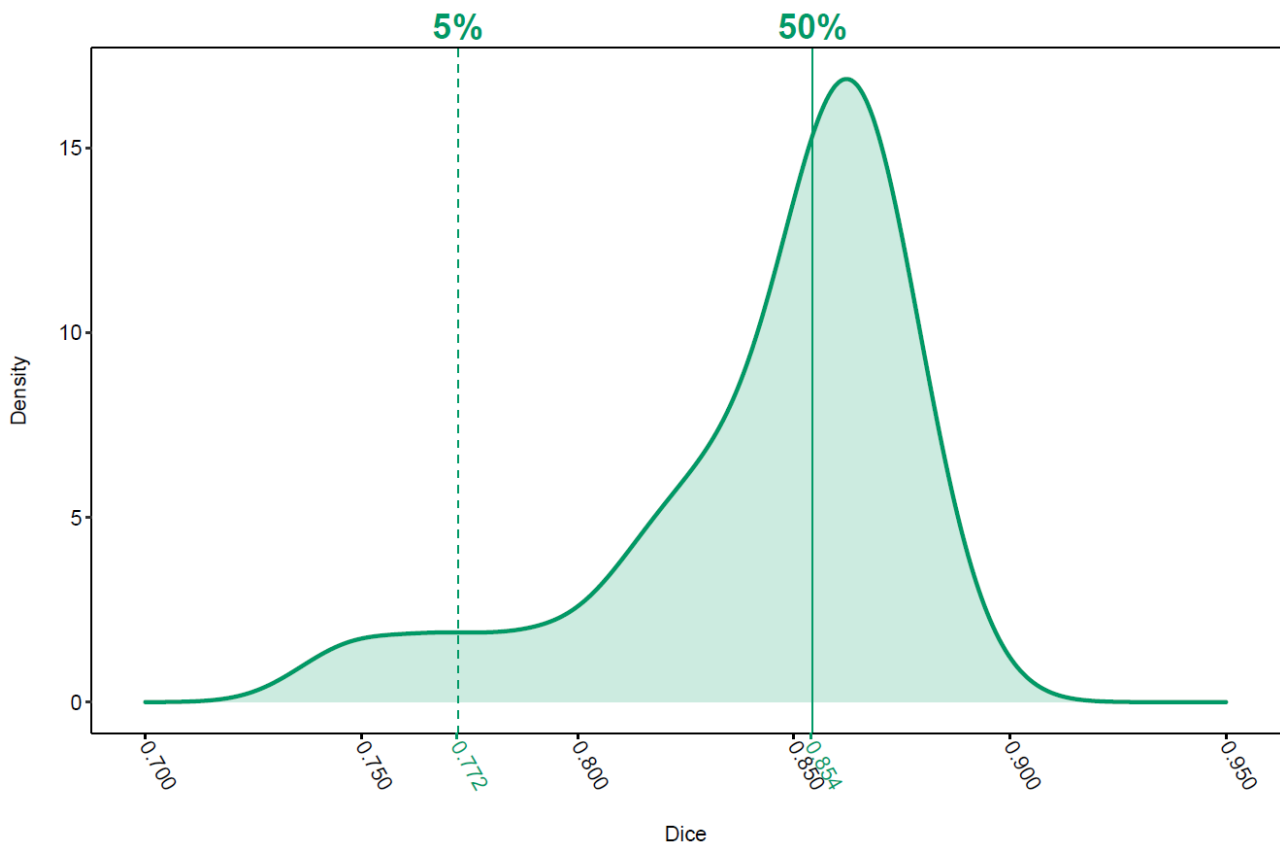

Supplement: 41598_2023_50980_MOESM1_ESM.pdf [file 41598_2023_50980_MOESM1_ESM.pdf]
